# Supplementary material for: Global Transcriptomic Analysis of Interactions between Pseudomonas aeruginosa and Bacteriophage PaP3
Source: PubMed Central journal article supplement (PMC4707531; doi:10.1038/srep19237), 2016-01-11
Supplement: srep19237-s1.pdf [file srep19237-s1.pdf]

# Global Transcriptomic Analysis of Interactions between *Pseudomonas aeruginosa* and Bacteriophage PaP3

Xia Zhao<sup>1</sup>, Canhuang Chen<sup>2</sup>, Wei Shen<sup>1</sup>, Guangtao Huang<sup>3</sup>, Shuai Le<sup>1</sup>, Shuguang Lu<sup>1</sup>, Ming Li<sup>1</sup>, Yan Zhao<sup>1</sup>, Jing Wang<sup>1</sup>, Xiancai Rao<sup>1</sup>, Gang Li<sup>1</sup>, Mengyu Shen<sup>1</sup>, Keke Guo<sup>1</sup>, Yuhui Yang<sup>1</sup>, Yinling Tan<sup>1,\*</sup>, Fuquan Hu<sup>1,\*</sup>

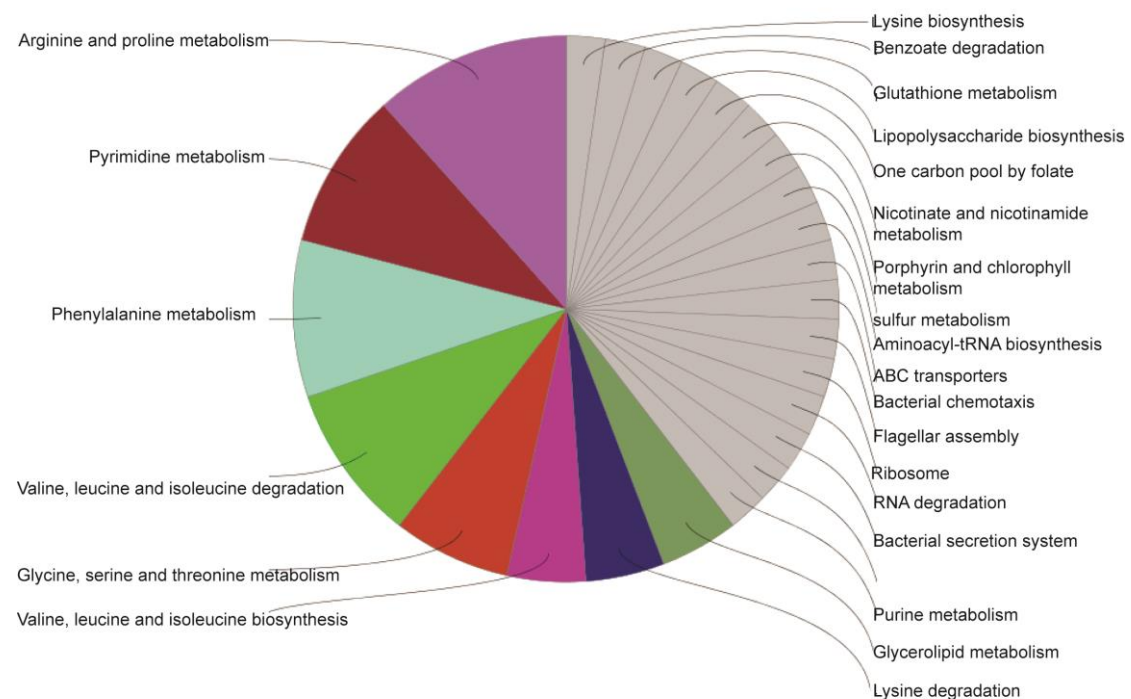

**Figure S1. Enriched KEGG pathways of 110 host genes in the merged network.**

All 110 genes of *P. aeruginosa* in the merged network were grouped into 24 KEGG pathways (K-score > 0.4, P < 0.05). Data visualization was performed by ClueGO/CluePedia plugins of Cytoscape software.

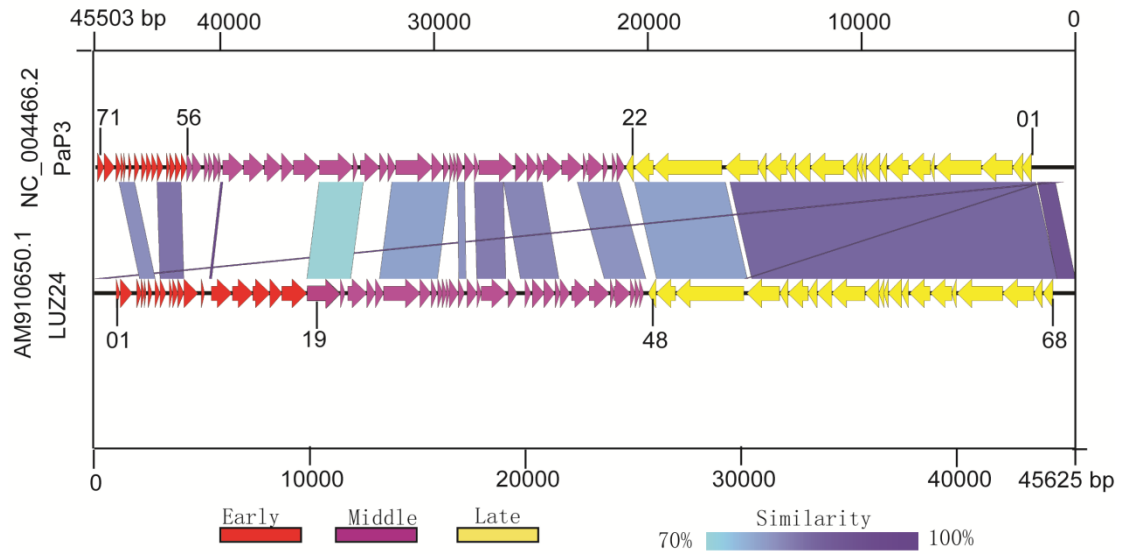

**Figure S2. Genomic comparison of phage PaP3 and LUZ24.** Putative ORFs are shown with arrows marked with the different color: early genes (red), middle genes (purple) and late genes (yellow). Boxes with different shades of blue represent degrees of similarities between genomes.

**Table S1 The p-value of significantly changed KEGG pathways.**

| KEGG pathway                          | 5 min    | 10 min   | 20 min   | 30 min   | 80 min   |
|---------------------------------------|----------|----------|----------|----------|----------|
| Aminoacyl-tRNA biosynthesis           | 0.002847 | 0.0381   | 0.01103  | 0.07519  | 0.8436   |
| Bacterial chemotaxis                  | 0.1818   | 0.004459 | 0.2288   | 0.452    | 0.7706   |
| Bacterial secretion system            | 1        | 0.001407 | 0.001041 | 0.002264 | 0.6869   |
| Biosynthesis of amino acids           | 0.5637   | 0.05282  | 8.04E-08 | 1.55E-07 | 0.1147   |
| Biosynthesis of secondary metabolites | 0.8472   | 0.1228   | 5.41E-05 | 3.8E-05  | 0.00452  |
| Butanoate metabolism                  | 0.003654 | 0.7211   | 0.4368   | 0.2782   | 0.1253   |
| Fatty acid metabolism                 | 0.009829 | 0.4029   | 0.5599   | 0.3825   | 0.02331  |
| Flagellar assembly                    | 0.1271   | 0.000191 | 0.03886  | 0.08688  | 0.1795   |
| Geraniol degradation                  | 0.4727   | 0.2349   | 0.01203  | 0.000248 | 0.6948   |
| Glycolysis / Gluconeogenesis          | 0.07829  | 0.006753 | 0.01245  | 0.0508   | 0.3593   |
| Metabolic pathways                    | 0.8949   | 0.2031   | 2.47E-08 | 3.81E-13 | 0.001815 |
| Naphthalene degradation               | 0.008149 | 0.05892  | 0.1772   | 0.1984   | 0.1416   |
| Oxidative phosphorylation             | 0.1615   | 0.209    | 1.5E-05  | 1.21E-06 | 3.06E-11 |
| Purine metabolism                     | 0.04464  | 0.007815 | 5E-10    | 9.53E-12 | 0.04657  |
| Pyrimidine metabolism                 | 0.4328   | 0.4945   | 1.18E-06 | 3.93E-09 | 0.3854   |
| Ribosome                              | 1        | 0.2057   | 1.6E-08  | 8.18E-11 | 2.2E-16  |
| Sulfur relay system                   | 0.01899  | 0.02263  | 0.000106 | 1.14E-05 | 1        |
| Vitamin B6 metabolism                 | 0.5726   | 0.2341   | 0.005584 | 0.000695 | 1        |

**Table S2. Comparison of PseudoCAP functions for the DEGs of *P. aeruginosa* at different infection time point.**

| PseudoCAP function                                        | Total number | 5 min |      | 10 min |      | 20 min |      | 30 min |      | 80 min |      |
|-----------------------------------------------------------|--------------|-------|------|--------|------|--------|------|--------|------|--------|------|
|                                                           |              | Up    | Down | Up     | Down | Up     | Down | Up     | Down | Up     | Down |
| Adaptation, Protection                                    | 179          | 0     | 1    | 0      | 14   | 0      | 51   | 0      | 64   | 0      | 4    |
| Amino acid biosynthesis and metabolism                    | 239          | 0     | 1    | 0      | 28   | 0      | 103  | 0      | 133  | 0      | 1    |
| Antibiotic resistance and susceptibility                  | 55           | 0     | 0    | 0      | 1    | 0      | 9    | 0      | 14   | 0      | 0    |
| Biosynthesis of cofactors, prosthetic groups and carriers | 160          | 0     | 2    | 0      | 11   | 0      | 67   | 0      | 72   | 0      | 0    |
| Carbon compound catabolism                                | 172          | 0     | 0    | 1      | 9    | 1      | 34   | 3      | 42   | 0      | 0    |
| Cell division                                             | 29           | 0     | 0    | 0      | 1    | 0      | 21   | 0      | 27   | 0      | 0    |
| Cell wall / LPS / capsule                                 | 182          | 0     | 1    | 0      | 17   | 0      | 54   | 0      | 61   | 1      | 0    |
| Central intermediary metabolism                           | 99           | 0     | 1    | 0      | 4    | 0      | 31   | 0      | 40   | 0      | 0    |
| Chaperones & heat shock proteins                          | 56           | 0     | 0    | 0      | 3    | 1      | 20   | 0      | 25   | 0      | 2    |
| Chemotaxis                                                | 64           | 0     | 2    | 0      | 9    | 0      | 48   | 0      | 57   | 0      | 2    |
| DNA replication, recombination, modification and repair   | 88           | 0     | 0    | 0      | 8    | 0      | 33   | 0      | 37   | 0      | 1    |
| Energy metabolism                                         | 206          | 0     | 0    | 0      | 16   | 0      | 74   | 0      | 104  | 0      | 0    |
| Fatty acid and phospholipid metabolism                    | 62           | 0     | 0    | 0      | 8    | 0      | 27   | 1      | 26   | 0      | 3    |
| Hypothetical, unclassified, unknown                       | 2001         | 0     | 9    | 5      | 221  | 12     | 528  | 12     | 622  | 0      | 19   |
| Membrane proteins                                         | 675          | 0     | 5    | 2      | 38   | 8      | 149  | 8      | 166  | 0      | 4    |
| Motility & Attachment                                     | 121          | 0     | 3    | 0      | 20   | 2      | 51   | 0      | 51   | 1      | 1    |
| Non-coding RNA gene                                       | 105          | 0     | 0    | 0      | 0    | 0      | 6    | 1      | 11   | 0      | 1    |
| Nucleotide biosynthesis and metabolism                    | 87           | 0     | 0    | 0      | 7    | 0      | 40   | 0      | 47   | 0      | 2    |
| Protein secretion/export apparatus                        | 124          | 0     | 0    | 0      | 6    | 0      | 20   | 0      | 23   | 0      | 1    |
| Putative enzymes                                          | 473          | 0     | 3    | 0      | 38   | 0      | 106  | 1      | 128  | 0      | 0    |
| Related to phage, transposon, or plasmid                  | 65           | 0     | 1    | 1      | 1    | 0      | 6    | 0      | 9    | 0      | 0    |
| Secreted Factors (toxins, enzymes, alginate)              | 105          | 0     | 0    | 0      | 5    | 0      | 13   | 0      | 17   | 0      | 0    |
| Transcription, RNA processing and degradation             | 55           | 0     | 0    | 0      | 4    | 1      | 30   | 1      | 34   | 0      | 0    |
| Transcriptional regulators                                | 476          | 0     | 8    | 0      | 63   | 1      | 120  | 0      | 126  | 0      | 5    |
| Translation, post-translational modification, degradation | 197          | 0     | 0    | 0      | 8    | 1      | 98   | 0      | 124  | 0      | 13   |
| Transport of small molecules                              | 597          | 0     | 2    | 1      | 36   | 4      | 144  | 5      | 169  | 1      | 4    |
| Two-component regulatory systems                          | 121          | 0     | 1    | 0      | 13   | 0      | 38   | 0      | 38   | 0      | 3    |

**Table S3. Gene co-expression analysis of phage and host transcriptional regulators.**

| Time  | Host gene   | Phage gene | cor      | p-value  | Host gene Function      |
|-------|-------------|------------|----------|----------|-------------------------|
| 10min | <i>vqsR</i> | ORF50      | -0.99029 | 0.009722 | QS system and virulence |
| 10min | <i>argR</i> | ORF52      | -0.99052 | 0.009722 | Arginine metabolism     |
| 10min | <i>gacA</i> | ORF53      | -0.99956 | 0.005556 | Biofilm                 |
| 10min | PA2588      | ORF53      | -0.99481 | 0.005556 |                         |
| 10min | <i>rpoS</i> | ORF53      | -0.99507 | 0.005556 | QS system and virulence |
| 10min | <i>vqsR</i> | ORF53      | -0.99014 | 0.001389 | QS system and virulence |
| 20min | PA1015      | ORF28      | -0.99148 | 0.004167 |                         |
| 20min | PA2551      | ORF29      | -0.99693 | 0.006944 |                         |
| 20min | PA2551      | ORF30      | -0.99422 | 0.006944 |                         |
| 20min | PA2551      | ORF32      | -0.99353 | 0.006944 |                         |
| 20min | <i>gacA</i> | ORF33      | -0.99088 | 0.001389 | Biofilm                 |
| 20min | <i>gacA</i> | ORF34      | -0.9987  | 0.006944 | Biofilm                 |
| 20min | <i>gacA</i> | ORF36      | -0.99195 | 0.004167 | Biofilm                 |
| 20min | <i>gacA</i> | ORF40      | -0.99564 | 0.004167 | Biofilm                 |
| 20min | <i>gacA</i> | ORF44      | -0.99715 | 0.004167 | Biofilm                 |
| 20min | PA2096      | ORF45      | -0.99096 | 0.006944 |                         |
| 20min | PA1261      | ORF46      | -0.99155 | 0.008333 |                         |
| 20min | PA2096      | ORF46      | -0.99331 | 0.008333 |                         |
| 30min | PA1261      | ORF19      | -0.99117 | 0.005556 |                         |
| 30min | <i>argR</i> | ORF23      | -0.99053 | 0.001389 | Arginine metabolism     |
| 30min | PA2096      | ORF27      | -0.99493 | 0.008333 |                         |
| 30min | PA4878      | ORF31      | -0.99348 | 0.005556 |                         |
| 30min | PA1859      | ORF39      | -0.99304 | 0.008333 |                         |
| 30min | PA2588      | ORF39      | -0.99609 | 0.002778 |                         |
| 30min | PA0163      | ORF52      | 0.993627 | 0.009722 |                         |

**Table S7. Primers for Real-Time qPCR.**

|                   |                           |
|-------------------|---------------------------|
| <i>16S rRNA-F</i> | CAAAACTACTGAGCTAGAGTACG   |
| <i>16S rRNA-R</i> | TAAGATCTCAAGGATCCCAACGGCT |
| <i>rpsC-F</i>     | ACGCAGACCGCAAGAACTATG     |
| <i>rpsC-R</i>     | GCACGGGCACACCCATTTG       |
| <i>rpsD-F</i>     | GACCGTCAACATCCCTTCCTACC   |
| <i>rpsD-R</i>     | GAGTTCAGAGCCTGAGCGATAC    |
| <i>rplN-F</i>     | GGTCGTTCGCACCAAGCAC       |
| <i>rplN-R</i>     | ACTTCTCGGTACGGAGTTCACG    |
| <i>pdxH-F</i>     | GCGATCCCTTCAGCCTGTTC      |
| <i>pdxH-R</i>     | CTTGGCGCTTTCGTAGTTGGT     |
| <i>dadA-F</i>     | GCTACCGCAACCTGTTCTCA      |
| <i>dadA-R</i>     | GGCATTCTTGGCGTTCTCC       |
| <i>ndh-F</i>      | ACGCCAACCTCACCCACAT       |
| <i>ndh-R</i>      | CGCCATTCTCGTCCACCA        |
| <i>rpoS-F</i>     | CGATCATCCGCTTCCGACCAG     |
| <i>rpoS-R</i>     | CTCCCCGGGCAACTCCAAAAG     |
| <i>fabA-F</i>     | CCGGGTAACGCGCAACT         |
| <i>fabA-R</i>     | CCGACATCGCTGATGTGAAC      |
